# Supplementary material for: Advantage of a higher position of the tracheostoma with glottic closure for preventing complications related to tracheostomy tube: a retrospective cohort study
Source: PubMed Central journal article supplement (PMC8832853; doi:10.1186/s12893-022-01505-2), 2022-02-11
Supplement: 12893_2022_1505_MOESM1_ESM.pdf [file 12893_2022_1505_MOESM1_ESM.pdf]

Advantage of a higher position of the tracheostoma with glottic closure for preventing complications related to tracheostomy tube: a retrospective cohort study

| Case No | Ope- type | Ope- Age (y) | Sex | Primary disease"              | Prior- tracheostomy | FOIS score |        | Pneumonia- hospitalization (day/year) |        | Respir- ator | Canula -free |
|---------|-----------|--------------|-----|-------------------------------|---------------------|------------|--------|---------------------------------------|--------|--------------|--------------|
|         |           |              |     |                               |                     | preop      | postop | preop                                 | postop |              |              |
| 1       | LTS       | 1            | F   | Gaucher disease               | -                   | 1          | 1      | 0                                     | 19     | day          | -            |
| 2       | LTS       | 3            | M   | WEST syndrome                 | +                   | 1          | 1      | 30                                    | 0      | night        | -            |
| 3       | LTS       | 3            | M   | White matter dystrophy        | -                   | 1          | 1      | 89                                    | 57     | night        | -            |
| 4       | LTS       | 4            | F   | Cerebral palsy                | -                   | 1          | 1      | 96                                    | 16     | -            | -            |
| 5       | LTS       | 7            | M   | Trisomy 18                    | +                   | 1          | 1      | 99                                    | 0      | day          | -            |
| 6       | LTS       | 7            | M   | Degenerative disease          | -                   | 1          | 1      | 108                                   | 0      | night        | -            |
| 7       | LTS       | 7            | M   | Cerebral palsy                | +                   | 1          | 1      | 73                                    | 42     | night        | -            |
| 8       | LTS       | 11           | M   | Degenerative disease          | -                   | 1          | 1      | 15                                    | 0      | night        | -            |
| 9       | LTS       | 14           | F   | Congenital anomaly            | +                   | 1          | 1      | 15                                    | 0      | -            | -            |
| 10      | LTS       | 17           | F   | Amyotrophic lateral sclerosis | -                   | 1          | 3      | 39                                    | 9      | -            | -            |
| 11      | LTS       | 17           | F   | Anoxic injury                 | -                   | 1          | 1      | 246                                   | 0      | -            | -            |

|    |     |    |   |                                     |   |   |   |     |    |       |   |
|----|-----|----|---|-------------------------------------|---|---|---|-----|----|-------|---|
| 12 | LTS | 25 | F | Anoxic injury                       | - | 1 | 1 | 69  | 0  | day   | - |
| 13 | GC  | 2  | M | Brain stem<br>bleeding              | + | 1 | 3 | 116 | 13 | day   | - |
| 14 | GC  | 2  | M | Cerebral palsy                      | - | 1 | 2 | 18  | 25 | night | - |
| 15 | GC  | 5  | F | West syndrome                       | - | 1 | 1 | 29  | 45 | night | - |
| 16 | GC  | 10 | F | West syndrome                       | - | 1 | 2 | 25  | 86 | night | - |
| 17 | GC  | 11 | F | Anoxic injury                       | - | 2 | 3 | 0   | 0  | night | + |
| 18 | GC  | 11 | M | Pelizaeus-<br>Merzbacher<br>disease | - | 1 | 2 | 44  | 0  | night | + |
| 19 | GC  | 14 | F | Anoxic injury                       | + | 1 | 1 | 3   | 0  | night | + |
| 20 | GC  | 14 | M | Cerebral palsy                      | - | 1 | 1 | 36  | 14 | night | - |
| 21 | GC  | 16 | F | Fukuyama<br>muscular<br>dystrophy   | - | 1 | 2 | 36  | 15 | day   | - |
| 22 | GC  | 20 | F | Cerebral palsy                      | - | 3 | 3 | 39  | 32 | night | - |
| 23 | GC  | 20 | M | Cerebral palsy                      | - | 1 | 1 | 13  | 0  | night | + |
| 24 | GC  | 26 | M | Mitochondrial<br>disease            | - | 1 | 1 | 25  | 9  | day   | - |
| 25 | GC  | 30 | F | Cerebral palsy                      | - | 3 | 2 | 70  | 0  | night | - |
| 26 | GC  | 31 | F | Anoxic injury                       | - | 1 | 1 | 19  | 0  | day   | - |
| 27 | GC  | 33 | F | Rett syndrome                       | - | 1 | 1 | 75  | 0  | day   | - |

FOIS: Functional Oral Intake Scale<sup>1</sup>

1. Crary MA, Mann GD, Groher ME. Initial psychometric assessment of a functional oral intake scale for dysphagia in stroke patients. Arch Phys Med Rehabil 2005; 86:1516-1520.
